# Supplementary material for: The effect of spin polarization in DEER spectroscopy
Source: Copernicus journal article supplement (doi:10.5194/mr-2022-8), 2022-05-16

**Uniform B-spin distribution**

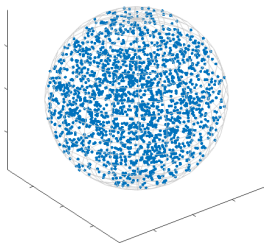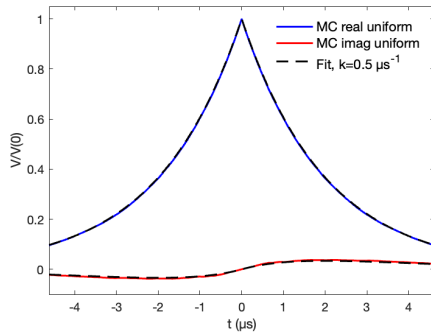

**Aggregated B-spin distribution**

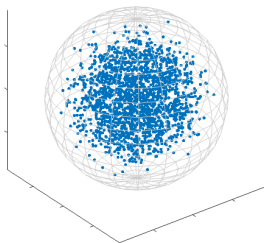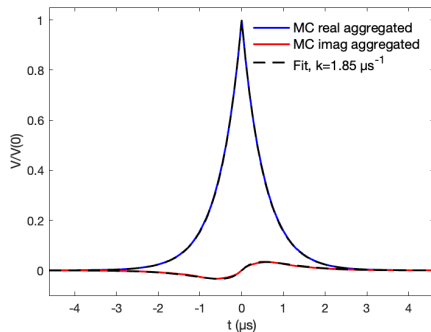

Supplement: Supplementary file [file mr-2022-8-AC3-supplement.pdf]
